# Supplementary material for: An international survey on the impact of COVID-19 in individuals with Down syndrome
Source: medRxiv preprint, doi:10.1101/2020.11.03.20225359, version 1 (2020-11-05)
Supplement: Caregiver/family survey [file 225359_file04.docx]

Emory University

Library Information Technology Services

**Down syndrome and COVID-19**


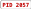


$ Codebook

**Data Dictionary Codebook**

**Caregiver/family Survey—English version** 10/25/2020 8:27am

% Collapse all instruments

| 1 | Self-reporting. I am the person with Down syndrome |
| --- | --- |
| 2 | Self-reporting or family member |
| 3 | Unrelated caregiver |
| 4 | Other |

| **#** | **Variable / Field Name** | **Field Label**  ***Field Note*** | **Field Attributes (Field Type, Validation, Choices, Calculations, etc.)** | | | | | | |
| --- | --- | --- | --- | --- | --- | --- | --- | --- | --- |
| Instrument: **Landing Page** (landing_page) ' Enabled as survey & Expand | | | | | | | | | |
| Instrument: **Family Eng** (family_eng) ' Enabled as survey % Collapse | | | | | | | | | |
| 11 | relation | Section Header: *Please describe who you are and then answer general questions about the person with Down syndrome.*  What is your relationship to the person with Down syndrome? | radio  Field Annotation: @HIDECHOICE="1" | | | | | | |
| 12 | other_relation  Show the ﬁeld ONLY if: [relation] = '4' | Please specify your relationship. | text | | | | | | |
| 13 | age | How old (in years) is the person with Down syndrome? (Please enter "0" if the person is a newborn baby.) | text (number, Min: 0, Max: 100), Required | | | | | | |
| 14 | gender | How do they identify themselves? | radio, Required | | | | | | |
|  | 1 | Female | | |  | |
| 2 | Male | | |
| 3 | Other | | |
| 4 | Choose not to answer | | |
| 15 | race | What is their race? | text  Field Annotation: @HIDDEN | | | | | | |
| 16 | who_group | What is their ethnic group (as deﬁned by World Health  Organization)? Please check all that apply: | checkbox | | | | | | |
|  | 1 | | who_group 1 | Aboriginal First Nations | |  |
| 2 | | who_group 2 | Arab | |
| 3 | | who_group 3 | Black | |
| 4 | | who_group 4 | East Asian (e.g., China, Korea, Japan) | |
| 5 | | who_group 5 | Latin American (e.g., Mexico, Brazil, Peru) | |
| 6 | | who_group 6 | South Asian (e.g., Afghanistan, India, Pakistan) | |
| 7 | | who_group 7 | West Asian (e.g., Saudi  Arabia, Syria, Turkey) | |
| 8 | | who_group 8 | White | |
| 9 | | who_group 9 | Other | |
| 10 | | who_group 10 | Choose not to answer | |
| 17 | ethnicity | How do they describe their ethnicity? | text | | | | | | |

| 1 | Borderline/normal |
| --- | --- |
| 2 | Mild |
| 3 | Moderate |
| 4 | Severe/Profound |
| 5 | Don't know |
| 6 | Choose not to answer |

| 18 | trisomy_type | Type of trisomy 21 | radio | | | |
| --- | --- | --- | --- | --- | --- | --- |
|  | 1 | Full/standard |  |
| 2 | Mosaic |
| 3 | Translocation |
| 4 | Partial trisomy |
| 5 | Don't know |
| 19 | id_level | Level of intellectual disability | radio  Field Annotation: @HIDECHOICE="1" | | | |

20 country Section Header:

| 1 | Afghanistan |
| --- | --- |
| 2 | Albania |
| 3 | Algeria |
| 4 | Andorra |
| 5 | Angola |
| 6 | Antigua & Deps |
| 7 | Argentina |
| 8 | Armenia |
| 9 | Australia |
| 10 | Austria |
| 11 | Azerbaijan |
| 12 | Bahamas |
| 13 | Bahrain |
| 14 | Bangladesh |
| 15 | Barbados |
| 16 | Belarus |
| 17 | Belgium |
| 18 | Belize |
| 19 | Benin |
| 20 | Bhutan |
| 21 | Bolivia |
| 22 | Bosnia Herzegovina |
| 23 | Botswana |
| 24 | Brazil |
| 25 | Brunei |
| 26 | Bulgaria |
| 27 | Burkina |
| 28 | Burundi |
| 29 | Cambodia |
| 30 | Cameroon |
| 31 | Canada |
| 32 | Cape Verde |
| 33 | Central African Rep |
| 34 | Chad |
| 35 | Chile |
| 36 | China |
| 37 | Colombia |
| 38 | Comoros |
| 39 | Congo |
| 40 | Congo {Democratic Rep} |
| 41 | Costa Rica |
| 42 | Croatia |
| 43 | Cuba |
| 44 | Cyprus |
| 45 | Czech Republic |
| 46 | Denmark |
| 47 | Djibouti |
| 48 | Dominica |

In what country do they live?

dropdown

|  |  |  |  | 49 | Dominican Republic |  |
| --- | --- | --- | --- | --- | --- | --- |
| 50 | East Timor |
| 51 | Ecuador |
| 52 | Egypt |
| 53 | El Salvador |
| 54 | Equatorial Guinea |
| 55 | Eritrea |
| 56 | Estonia |
| 57 | Ethiopia |
| 58 | Fiji |
| 59 | Finland |
| 60 | France |
| 61 | Gabon |
| 62 | Gambia |
| 63 | Georgia |
| 64 | Germany |
| 65 | Ghana |
| 66 | Greece |
| 67 | Grenada |
| 68 | Guatemala |
| 69 | Guinea |
| 70 | Guinea-Bissau |
| 71 | Guyana |
| 72 | Haiti |
| 73 | Honduras |
| 74 | Hungary |
| 75 | Iceland |
| 76 | India |
| 77 | Indonesia |
| 78 | Iran |
| 79 | Iraq |
| 80 | Ireland {Republic} |
| 81 | Israel |
| 82 | Italy |
| 83 | Ivory Coast |
| 84 | Jamaica |
| 85 | Japan |
| 86 | Jordan |
| 87 | Kazakhstan |
| 88 | Kenya |
| 89 | Kiribati |
| 90 | Korea North |
| 91 | Korea South |
| 92 | Kosovo |
| 93 | Kuwait |
| 94 | Kyrgyzstan |
| 95 | Laos |
| 96 | Latvia |
|  | | | |

|  |  |  |  | 97 | Lebanon |  |
| --- | --- | --- | --- | --- | --- | --- |
| 98 | Lesotho |
| 99 | Liberia |
| 100 | Libya |
| 101 | Liechtenstein |
| 102 | Lithuania |
| 103 | Luxembourg |
| 104 | Macedonia |
| 105 | Madagascar |
| 106 | Malawi |
| 107 | Malaysia |
| 108 | Maldives |
| 109 | Mali |
| 110 | Malta |
| 111 | Marshall Islands |
| 112 | Mauritania |
| 113 | Mauritius |
| 114 | Mexico |
| 115 | Micronesia |
| 116 | Moldova |
| 117 | Monaco |
| 118 | Mongolia |
| 119 | Montenegro |
| 120 | Morocco |
| 121 | Mozambique |
| 195 | Myanmar (Burma) |
| 122 | Namibia |
| 123 | Nauru |
| 124 | Nepal |
| 125 | Netherlands |
| 126 | New Zealand |
| 127 | Nicaragua |
| 128 | Niger |
| 129 | Nigeria |
| 130 | Norway |
| 131 | Oman |
| 132 | Pakistan |
| 133 | Palau |
| 134 | Panama |
| 135 | Papua New Guinea |
| 136 | Paraguay |
| 137 | Peru |
| 138 | Philippines |
| 139 | Poland |
| 140 | Portugal |
| 141 | Qatar |
| 142 | Romania |
| 143 | Russian Federation |
|  | | | |

|  |  |  |  | 144 | Rwanda |  |
| --- | --- | --- | --- | --- | --- | --- |
| 145 | St Kitts & Nevis |
| 146 | St Lucia |
| 147 | Saint Vincent & the Grenadines |
| 148 | Samoa |
| 149 | San Marino |
| 150 | Sao Tome & Principe |
| 151 | Saudi Arabia |
| 152 | Senegal |
| 153 | Serbia |
| 154 | Seychelles |
| 155 | Sierra Leone |
| 156 | Singapore |
| 157 | Slovakia |
| 158 | Slovenia |
| 159 | Solomon Islands |
| 160 | Somalia |
| 161 | South Africa |
| 162 | Spain |
| 163 | Sri Lanka |
| 164 | Sudan |
| 165 | Suriname |
| 166 | Swaziland |
| 167 | Sweden |
| 168 | Switzerland |
| 169 | Syria |
| 170 | Taiwan |
| 171 | Tajikistan |
| 172 | Tanzania |
| 173 | Thailand |
| 174 | Togo |
| 175 | Tonga |
| 176 | Trinidad & Tobago |
| 177 | Tunisia |
| 178 | Turkey |
| 179 | Turkmenistan |
| 180 | Tuvalu |
| 181 | Uganda |
| 182 | Ukraine |
| 183 | United Arab Emirates |
| 184 | United Kingdom |
| 185 | United States |
| 186 | Uruguay |
| 187 | Uzbekistan |
| 188 | Vanuatu |
| 189 | Vatican City |
| 190 | Venezuela |
| 191 | Vietnam |
|  | | | |

192 Yemen

193 Zambia

194 Zimbabwe

21 region What region of that country (e.g., state, province, district, county)?

text

22 residence What best describes their living situation before the COVID-19 outbreak?

radio

1 Living at home with family

7 Living alone with no support (autonomously)

2 Living alone with support

3 Small group home with support

4 Residential care facility

5 Other

6 Don't know

23 residence_other

Show the ﬁeld ONLY if: [residence] = '5'

Please specify other setting. text

24 change_residence Did they change their living situation because of the COVID-19 outbreak?

radio

1 Yes

2 No

3 Don't know

25 change

Show the ﬁeld ONLY if: [change_residence] = '1'

Please describe their current living situation. radio

1 Living at home with family

7 Living alone with no support (autonomously)

2 Living alone with support

3 Small group home with support

4 Residential care facility

5 Other

6 Don't know / Not applicable

26 change_oth

Show the ﬁeld ONLY if: [change] = '5'

Please specify other setting. text

27 contacts_yn Did anyone test positive or have signs or symptoms of

COVID-19 where the person with Down syndrome lived during the outbreak?

radio

1 Yes

2 No

3 Don't know / Not applicable

28 chd_yn Section Header: *This section asks about medical conditions that existed before the COVID-19 outbreak (referred to as "pre-existing conditions").*

Did the person with Down syndrome have a congenital heart defect?

radio

1 Yes

2 No

3 Don't know

29 chd_surgery

Show the ﬁeld ONLY if: [chd_yn] = '1'

Did the heart defect require surgery? radio

1 Yes surgery was done and fully correct the defect

2 Yes surgery was done but did not fully correct the defect

3 No surgery was required

4 Don't know

30 psychiatric_yn Does the person with Down syndrome have a current diagnosis of any behavioral and psychiatric condition (for example,

| 1 | Yes |
| --- | --- |
| 2 | No |
| 3 | Don't know |

autism spectrum disorder)?

radio

31 psychiatric_type

Show the ﬁeld ONLY if: [psychiatric_yn] = '1'

Please check all that apply. checkbox

1 psychiatric_type 1 Autism spectrum disorder

2 psychiatric_type 2 Depression

3 psychiatric_type 3 ADHD/ADD

4 psychiatric_type 4 Anxiety

5 psychiatric_type 5 Obsessive-compulsive disorder (OCD)

6 psychiatric_type 6 Behavior problems

7 psychiatric_type 7 Psychosis

8 psychiatric_type 8 Other (for example, regression disorder/disintegrative disorder, ...)

32 psych_other

Please specify. text

Show the ﬁeld ONLY if: [psychiatric_type(8)] = '1'

33 alz Section Header: *Please check the following pre-existing conditions diagnosed by a doctor if experienced by the person with Down syndrome.*

Alzheimer disease/dementia

radio (Matrix)

1 Yes--currently being treated

2 Yes--not being treated

3 In the past--no current treatment

4 Never diagnosed

5 Don't know

34 thyroid Thyroid disorder radio (Matrix)

1 Yes--currently being treated

2 Yes--not being treated

3 In the past--no current treatment

4 Never diagnosed

5 Don't know

35 seizure Seizures/epilepsy radio (Matrix)

1 Yes--currently being treated

2 Yes--not being treated

3 In the past--no current treatment

4 Never diagnosed

5 Don't know

36 blood_cancer Blood cancer (e.g., leukemia,lymphoma) radio (Matrix)

1 Yes--currently being treated

2 Yes--not being treated

3 In the past--no current treatment

4 Never diagnosed

5 Don't know

37 other_cancer Other cancer radio (Matrix)

| 1 | Yes--currently being treated |
| --- | --- |
| 2 | Yes--not being treated |
| 3 | In the past--no current treatment |
| 4 | Never diagnosed |
| 5 | Don't know |

38 immumo Immuno-compromised (e.g,, on cancer treatment) radio (Matrix)

1 Yes--currently being treated

2 Yes--not being treated

3 In the past--no current treatment

4 Never diagnosed

5 Don't know

39 osa Obstructive sleep apnea radio (Matrix)

1 Yes--currently being treated

2 Yes--not being treated

3 In the past--no current treatment

4 Never diagnosed

5 Don't know

40 obesity Obesity radio (Matrix)

1 Yes--currently being treated

2 Yes--not being treated

3 In the past--no current treatment

4 Never diagnosed

5 Don't know

41 hyperten Hypertension radio (Matrix)

1 Yes--currently being treated

2 Yes--not being treated

3 In the past--no current treatment

4 Never diagnosed

5 Don't know

42 diabetes Diabetes radio (Matrix)

1 Yes--currently being treated

2 Yes--not being treated

3 In the past--no current treatment

4 Never diagnosed

5 Don't know

43 cvd Cerebrovascular disease radio (Matrix)

1 Yes--currently being treated

2 Yes--not being treated

3 In the past--no current treatment

4 Never diagnosed

5 Don't know

44 cad Coronary heart disease radio (Matrix)

1 Yes--currently being treated

2 Yes--not being treated

3 In the past--no current treatment

4 Never diagnosed

5 Don't know

45 renal Chronic renal disease radio (Matrix)

| 1 | Yes--currently being treated |
| --- | --- |
| 2 | Yes--not being treated |
| 3 | In the past--no current treatment |
| 4 | Never diagnosed |
| 5 | Don't know |

46 liver Chronic liver disease radio (Matrix)

1 Yes--currently being treated

2 Yes--not being treated

3 In the past--no current treatment

4 Never diagnosed

5 Don't know

47 lung Chronic lung disease (e.g., asthma, emphysema, COPD) radio (Matrix)

1 Yes--currently being treated

2 Yes--not being treated

3 In the past--no current treatment

4 Never diagnosed

5 Don't know

48 celiac Celiac disease radio (Matrix)

1 Yes--currently being treated

2 Yes--not being treated

3 In the past--no current treatment

4 Never diagnosed

5 Don't know

49 gerd Gastroesophageal reﬂux (GERD) radio (Matrix)

1 Yes--currently being treated

2 Yes--not being treated

3 In the past--no current treatment

4 Never diagnosed

5 Don't know

50 ibs Irritable bowel syndrome (IBS) radio (Matrix)

1 Yes--currently being treated

2 Yes--not being treated

3 In the past--no current treatment

4 Never diagnosed

5 Don't know

51 hep_b Heaptitis B infection radio (Matrix)

1 Yes--currently being treated

2 Yes--not being treated

3 In the past--no current treatment

4 Never diagnosed

5 Don't know

52 onset_seiz

Show the ﬁeld ONLY if: [seizure] = '1' or [seizure] = '2' or [seizure] = '3'

When did the seizures/epilepsy begin? radio

1 Before age 30 years

2 Age 30 years or older

3 Don't know

53 other_preexist_yn Do they have other pre-existing conditions not listed above? radio

1 Yes

2 No

3 Don't know

54 other_preexist_des

Show the ﬁeld ONLY if: [other_preexist_yn] = '1'

Please list other conditions that are currently diagnosed. text

| 1 | Yes |
| --- | --- |
| 2 | No |
| 3 | Don't know |

| 55 | other_meds | Section Header:  Are they currently being treated with any of the following medications for their pre-existing conditions (check all that apply)? | checkbox | | | | |
| --- | --- | --- | --- | --- | --- | --- | --- |
|  | 1 | other_meds_ 1 | | Angiotensin-converting enzyme (ACE) inhibitors (examples are: Benazepril (Lotensin), Captopril, Enalapril (Vasotec), Fosinopril, Lisinopril (Prinivil, Zestril), Moexipril, Perindopril, Quinapril (Accupril), Ramipril (Altace), Trandolapril)) |
| 2 | other_meds_ 2 | | Angiotensin receptor blockers (examples are: Azilsartan (Edarbi), Candesartan (Atacand), Eprosartan, Irbesartan (Avapro), Losartan (Cozaar), Olmesartan (Benicar), Telmisartan (Micardis), Valsartan (Diovan)) |
| 3 | other_meds_ 3 | | Systemic steroids given by mouth or injection (examples are: hydrocortisone (Cortef), cortisone, ethamethasoneb (Celestone), prednisone (Prednisone Intensol), prednisolone (Orapred, Prelone)) |
| 4 | other_meds_ 4 | | Immunosuppressants (e.g. anti-cancer or anti-rejection treatment) |
| 7 | other_meds_ 7 | | Palivizumab (sometimes given to young children who have problems associated with prematurity, lung or heart disease) |
| 5 | other_meds_ 5 | | Other |
| 6 | other_meds_ 6 | | None of the above |
| Field Annotation: @NONEOFTHEABOVE=6 | | | | |
| 56 | more_meds  Show the ﬁeld ONLY if: [other_meds(5)] = '1' | Please specify other medications for pre-existing conditions  (separate each medication by a comma). | text | | | | |
| 57 | vac_yn_fe | Section Header:  Do you know if the person with Down syndrome was  vaccinated for preventable illnesses in the past or currently (for example, chicken pox or the seasonal ﬂu)? | radio | | | | |
|  | 1 | Yes |  | |
| 2 | No |
| 3 | Don't know |
| 58 | ﬂu_fe  Show the ﬁeld ONLY if: [vac_yn_fe] = '1' | Seasonal ﬂu (inﬂuenza) vaccine -- given within the last 12-18 months | radio (Matrix) | | | | |
|  | 1 | Yes |  | |
| 2 | No |
| 3 | Don't know |
| 59 | td_fe  Show the ﬁeld ONLY if: [vac_yn_fe] = '1' | Tetanus, diphtheria, and pertussis (Td or Tdap) | radio (Matrix) | | | | |
|  | 1 | Yes |  | |
| 2 | No |
| 3 | Don't know |
| 60 | cp_fe  Show the ﬁeld ONLY if: [vac_yn_fe] = '1' | Chicken pox (Varicella, VZV) | radio (Matrix) | | | | |

61 mmr_fe

Show the ﬁeld ONLY if: [vac_yn_fe] = '1'

Measles mumps rubella vaccine (MMR) radio (Matrix)

1 Yes

2 No

3 Don't know

62 pol_fe

Show the ﬁeld ONLY if: [vac_yn_fe] = '1'

Polio vaccine radio (Matrix)

1 Yes

2 No

3 Don't know

63 rsv_fe

Show the ﬁeld ONLY if: [vac_yn_fe] = '1'

Respiratory syncytial virus (RSV) prophylaxis prophylaxis radio (Matrix)

1 Yes

2 No

3 Don't know

64 shinnew_fe

Show the ﬁeld ONLY if: [vac_yn_fe] = '1'

Shingles -- Shingrix (newer, 2-dose vaccine) radio (Matrix)

1 Yes

2 No

3 Don't know

65 shinold_fe

Show the ﬁeld ONLY if: [vac_yn_fe] = '1'

Shingles -- Zostavax (older vaccine) radio (Matrix)

1 Yes

2 No

3 Don't know

66 pne_fe

Show the ﬁeld ONLY if: [vac_yn_fe] = '1'

Pneumococcal vaccine radio (Matrix)

1 Yes

2 No

3 Don't know

67 hib_fe

Show the ﬁeld ONLY if: [vac_yn_fe] = '1'

Haemophilus inﬂuenza vaccine (Hib) radio (Matrix)

1 Yes

2 No

3 Don't know

68 tub_fe

Show the ﬁeld ONLY if: [vac_yn_fe] = '1'

Tuberculosis vaccine (Bacille Calmette-Guerin, BCG) radio (Matrix)

1 Yes

2 No

3 Don't know

69 yf_fe

Show the ﬁeld ONLY if: [vac_yn_fe] = '1'

Yellow fever vaccine (YF) radio (Matrix)

1 Yes

2 No

3 Don't know

70 rot_fe

Show the ﬁeld ONLY if: [vac_yn_fe] = '1'

Severe diarrhea vaccine (Rotavirus vaccine) radio (Matrix)

1 Yes

2 No

3 Don't know

71 hepa_fe

Show the ﬁeld ONLY if: [vac_yn_fe] = '1'

| 1 | Yes |
| --- | --- |
| 2 | No |
| 3 | Don't know |

Hepatitis A vaccine (Havrix, Vaqta) radio (Matrix)

1 Yes

2 No

3 Don't know

72 hepb_fe

Show the ﬁeld ONLY if: [vac_yn_fe] = '1'

Hepatitis B vaccine radio (Matrix)

73 men_fe

Show the ﬁeld ONLY if: [vac_yn_fe] = '1'

Meningitis (Meningococcal) vaccine radio (Matrix)

1 Yes

2 No

3 Don't know

74 hpv_fe

Show the ﬁeld ONLY if: [vac_yn_fe] = '1'

Papillomavirus (HPV) vaccine radio (Matrix)

1 Yes

2 No

3 Don't know

75 oth_vac_fe

Show the ﬁeld ONLY if: [vac_yn_fe] = '1'

Other scheduled vaccinations radio (Matrix)

1 Yes

2 No

3 Don't know

76 oth_vac_list_fe

Please list other vaccines text

Show the ﬁeld ONLY if: [oth_vac_fe] = '1'

77 test_done_yn Section Header: *COVID-19 testing*

Was COVID-19 testing performed (swab or blood test)?

radio

1 Yes

2 No

3 Don't know

78 testing_why

Show the ﬁeld ONLY if: [test_done_yn] = '1'

Why was COVID-10 testing done? radio

1 Symptoms were present

2 Possible contact with others who were aﬀected but no symptoms as yet

3 Routine testing--no speciﬁc indication

4 Don't know

79 test_result

Show the ﬁeld ONLY if: [test_done_yn] = '1'

What were the results of the testing? radio

1 Pending

2 Preliminary test positive, conﬁrmatory test pending

3 Preliminary test positive, conﬁrmatory test negative

4 Conﬁrmatory test positive

5 Test negative

6 Don't know

Field Annotation: @HIDDEN

80 test_swab

Show the ﬁeld ONLY if: [test_done_yn] = '1'

| 4 | Test not done |
| --- | --- |
| 1 | Test done: positive (antibodies detected) |
| 2 | Test done: negative (antibodies not detected) |
| 3 | Test done: results are pending |
| 5 | Don't know or results were ambiguous |

Was a nose / throat swab test performed? radio

4 Test not done

1 Test done: positive result

2 Test done: negative result

3 Test done: results are pending

5 Don't know or results were ambiguous

81 sars_fe

Show the ﬁeld ONLY if: [test_done_yn] = '1'

Was a blood test performed to test for antibodies against

COVID-19?

radio

82 symp_yn Section Header:

Do/did they have signs and symptoms of COVID-19?

radio

1 Yes

2 No

3 Don't know

83 symp_present

Show the ﬁeld ONLY if: [symp_yn] = '1'

Please check any of the following signs or symptoms related to

COVID-19 that they experienced.

checkbox

1 symp_present_ 1 Fever of 100.4°F/38°C or higher

2 symp_present_ 2 Chills

3 symp_present_ 3 Nasal signs (congestion, runny nose, etc)

15 symp_present_ 15 Cough

4 symp_present_ 4 Headache

5 symp_present_ 5 Sore throat

6 symp_present_ 6 Shortness of breath

7 symp_present_ 7 Nausea or vomiting

8 symp_present_ 8 Abdominal pain

9 symp_present_ 9 Diarrhea (3 or more loose/looser than normal stools within 24 hrs)

10 symp_present_ 10 Muscle or joint pain

17 symp_present_ 17 Skin lesions (example, rash, ulcers, chilblain-like lesions)

18 symp_present_ 18 Conjunctivitis (sometimes called "pink eye")

11 symp_present_ 11 Loss of smell or taste

16 symp_present_ 16 Not eating or drinking

12 symp_present_ 12 Extreme fatigue, confusion, diﬃculty staying alert

13 symp_present_ 13 Unexplained behavioral change

14 symp_present_ 14 Other

84 oth_symp

Show the ﬁeld ONLY if: [symp_present(14)] = '1'

Please specify. text

85 skin_loc

Show the ﬁeld ONLY if: [symp_present(17)] = '1'

Location of skin lesions (Please check all that apply): checkbox

1 skin_loc_ 1 Head and neck

2 skin_loc_ 2 Trunk

3 skin_loc_ 3 Upper limbs / hands

4 skin_loc_ 4 Lower limbs / toes

5 skin_loc_ 5 Mucous membranes

6 skin_loc_ 6 Other

86 skin_loc_spec

Please specify text

Show the ﬁeld ONLY if: [symp_present(17)] = '1'

87 hospital_yn Section Header:

Was the person with Down syndrome admitted to a hospital?

radio

1 Yes

2 No

3 Don't know

88 days

Show the ﬁeld ONLY if: [hospital_yn] = '1'

How many days in hospital? text (number, Min: 1, Max: 1000)

| 89 | icu_yn  Show the ﬁeld ONLY if: [hospital_yn] = '1' | Were they in an intensive care unit (ICU)? | radio | | | | |
| --- | --- | --- | --- | --- | --- | --- | --- |
|  | 1 | Yes |  | |
| 2 | No |
| 3 | Don't know |
| 90 | days_icu  Show the ﬁeld ONLY if: [icu_yn] = '1' | How many days in ICU? | text (number, Min: 1, Max: 1000) | | | | |
| 91 | ventilation  Show the ﬁeld ONLY if: [hospital_yn] = '1' | Were they put on a mechanical ventilation? | radio | | | | |
|  | 1 | Yes |  | |
| 2 | No |
| 3 | Don't know |
| 92 | outcome | Section Header:  At the last evaluation, what was their clinical situation? | radio | | | | |
|  | 1 | Not currently in hospital but with symptoms | |  |
| 2 | Currently in hospital with symptoms | |
| 3 | Tested positive but still no symptoms | |
| 4 | Recovered from COVID-19 | |
| 5 | Died | |
| 6 | Other | |
| 7 | Don't know | |
| 93 | outcome_other  Show the ﬁeld ONLY if: [outcome] = '6' | Please specify their clinical situation. | text | | | | |
| 94 | days_symp  Show the ﬁeld ONLY if: [outcome] = '1' or [outcome]  = '2' or [outcome] = '4' or [out come] = '5' or [outcome] = '6' | About how many days has/did the person with Down syndrome had/have symptoms of COVID-19? (Enter 0 if you do not know.) | text (integer, Min: 0, Max: 100) | | | | |
